# Supplementary material for: WY-14643 Regulates CYP1B1 Expression through Peroxisome Proliferator-Activated Receptor α-Mediated Signaling in Human Breast Cancer Cells
Source: PubMed Central journal article supplement (PMC6928855; doi:10.3390/ijms20235928), 2019-11-25
Supplement: ijms-20-05928-s001.pdf [file ijms-20-05928-s001.pdf]

## Supplementary figure

**Figure S1**

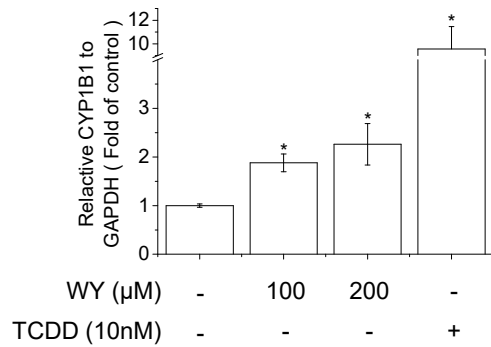

**Figure S1.** Effect of WY-14643 on CYP1B1 mRNA levels in MDA-MB-231 cells. Cells were treated with WY-14643 (100 and 200 μM) or TCDD (10 nM) for 24 h, then lysed; total RNA was prepared for PCR analysis of CYP1B1 mRNA levels, relative to the level of GAPDH. Bars are means  $\pm$  standard deviations of three independent experiments performed in triplicate. \* $p < 0.01$ , significantly different from the control.

**Figure S2**

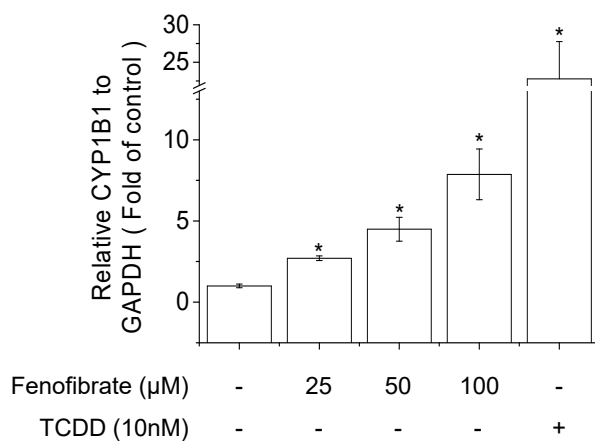

**Figure S2.** Effect of fenofibrate on CYP1B1 mRNA levels in MCF-7 cells. Cells were treated with fenofibrate (25, 50, and 100 μM) or TCDD (10 nM) for 24 h, then lysed; total RNA was prepared for PCR analysis of CYP1B1 mRNA levels, relative to the level of GAPDH. Bars are means  $\pm$  standard deviations of three independent experiments performed in triplicate. \* $p < 0.01$ , significantly different from the control.
